# Supplementary material for: Forward modelling of tree-ring width and comparison with a global network of tree-ring chronologies
Source: Copernicus journal article supplement (doi:10.5194/cp-10-437-2014), 2014-03-11
Supplement: Supplementary file 1 [file cp-10-437-2014-supplement.pdf]

## Supplementary Material

**Table S1.** Raw-ring width series from the ITRDB with identified errors.

| File                                                                                                                          | Series                                                                                                                                                                         | Problem                                                                | What has been done                                                               |
|-------------------------------------------------------------------------------------------------------------------------------|--------------------------------------------------------------------------------------------------------------------------------------------------------------------------------|------------------------------------------------------------------------|----------------------------------------------------------------------------------|
| ak051.rwl                                                                                                                     |                                                                                                                                                                                | Arstan cannot read in files                                            | Remove hyphens at the end of each label in each line                             |
| aust004.rwl                                                                                                                   | 108400, 108410, 108430, 108440, 108450, 108460, 108470, 108480, 108490, 108500, 108510, 108520, 108530, 108540, 108550, 108560, 108570, 108580, 108590, 108610, 108620, 108630 | 22 of 59 series are redundant<br>Decimal points<br>Erroneous time span | File not used                                                                    |
| aust005.rwl-<br>aust008.rwl                                                                                                   |                                                                                                                                                                                | Arstan cannot read in files                                            | Remove hyphens at the end of each header line                                    |
| brit015.rwl-<br>brit026.rwl,<br>brit048w.rwl,<br>brit049w.rwl                                                                 |                                                                                                                                                                                | Arstan cannot read in files                                            | Remove hyphens at the end of each header line                                    |
| brit020.rwl                                                                                                                   | 568112                                                                                                                                                                         | Erroneous time span                                                    | Delete -999 in last row                                                          |
| ca580.rwl-<br>ca597.rwl                                                                                                       |                                                                                                                                                                                | Arstan cannot read in files                                            | Remove underlines in header                                                      |
| cana038.rwl,<br>cana039.rwl,<br>cana041.rwl-<br>cana098.rwl,<br>cana111.rwl-<br>cana114.rwl,<br>cana168w.rwl-<br>cana173w.rwl |                                                                                                                                                                                | Arstan cannot read in files                                            | Remove hyphens at the end of each header line                                    |
| cana165.rwl-<br>cana167.rwl                                                                                                   |                                                                                                                                                                                | Erroneous time span                                                    | File not used                                                                    |
| cana262.rwl                                                                                                                   |                                                                                                                                                                                | Arstan cannot read in files                                            | Remove hyphen in middle header line                                              |
| cana275.rwl                                                                                                                   | bs480a1,<br>bs480a2                                                                                                                                                            | Erroneous time span                                                    | Change position of -9999                                                         |
| chil012.rwl                                                                                                                   | AGU261                                                                                                                                                                         | Erroneous time span                                                    | Change position of the line with 1940-1949 data to the right place in the series |
| co562.rwl                                                                                                                     | BLA08B                                                                                                                                                                         | Arstan cannot read in files                                            | Add 999 at end of series                                                         |
| czec.rwl                                                                                                                      |                                                                                                                                                                                | Units in ITRDB are given in feet                                       | Conversion from feet into metres                                                 |
| czec2.rwl                                                                                                                     |                                                                                                                                                                                | Units in ITRDB are given in feet                                       | Conversion from feet into metres                                                 |
| czec3.rwl                                                                                                                     |                                                                                                                                                                                | Units in ITRDB are given in feet                                       | Conversion from feet into metres                                                 |

|                                                               |        |                                                     |                                                                               |
|---------------------------------------------------------------|--------|-----------------------------------------------------|-------------------------------------------------------------------------------|
| fran015.rwl-<br>fran028.rwl,<br>fran032w.rwl,<br>fran033w.rwl |        | Arstan cannot read in files                         | Remove hyphens at the end of each header line                                 |
| germ014.rwl                                                   |        | Units in ITRDB are given in feet                    | Conversion from feet into metres                                              |
| germ018.rwl                                                   |        | Units in ITRDB are given in feet                    | Conversion from feet into metres                                              |
| germ1.rwl                                                     |        | Units in ITRDB are given in feet                    | Conversion from feet into metres                                              |
| germ12.rwl                                                    |        | Units in ITRDB are given in feet                    | Conversion from feet into metres                                              |
| germ15.rwl                                                    |        | Units in ITRDB are given in feet                    | Conversion from feet into metres                                              |
| germ16.rwl                                                    |        | Units in ITRDB are given in feet                    | Conversion from feet into metres                                              |
| germ17.rwl                                                    |        | Units in ITRDB are given in feet                    | Conversion from feet into metres                                              |
| germ18.rwl                                                    |        | Units in ITRDB are given in feet                    | Conversion from feet into metres                                              |
| germ21.rwl                                                    |        | Erroneous time span<br>Decimal points               | File not used                                                                 |
| germ3.rwl                                                     |        | Units in ITRDB are given in feet                    | Conversion from feet into metres                                              |
| germ301.rwl                                                   |        | Units in ITRDB are given in feet                    | Conversion from feet into metres                                              |
| germ4.rwl                                                     |        | Units in ITRDB are given in feet                    | Conversion from feet into metres                                              |
| germ5.rwl                                                     |        | Units in ITRDB are given in feet                    | Conversion from feet into metres                                              |
| ital006.rwl-<br>ital017.rwl                                   |        | Arstan cannot read in files                         | Remove hyphens at the end of each header line                                 |
| ital022.rwl                                                   |        | Units in ITRDB are given in feet                    | Conversion from feet into metres                                              |
| ital023.rwl                                                   | VIG641 | Erroneous time span                                 | Add 999 at end of series                                                      |
| ital027.rwl                                                   |        | Units in ITRDB are given in feet                    | Conversion from feet into metres                                              |
| ital2.rwl                                                     |        | Units in ITRDB are given in feet                    | Conversion from feet into metres                                              |
| mt115.rwl                                                     |        | No data available because it has not been added yet | File not used                                                                 |
| nc4.rwl                                                       |        | Arstan cannot read in files                         | Remove hyphens at the end of each header line<br>Add a break before year date |
| nc5.rwl-<br>nc11.rwl,<br>nc016.rwl                            |        | Format problems                                     | File not used                                                                 |
| neth005.rwl                                                   |        | No header info<br>Erroneous time span               | File not used                                                                 |

|                               |                                                                                                       |                                                    |                                                                                |
|-------------------------------|-------------------------------------------------------------------------------------------------------|----------------------------------------------------|--------------------------------------------------------------------------------|
| newz076.rwl                   |                                                                                                       | Arstan cannot read in files<br>Erroneous time span | Remove hyphen in series<br>Add break after series name<br>Change 9999 into 999 |
| nv505.rwl                     | Q43102                                                                                                | Erroneous time span                                | Add 999 at end of series                                                       |
| ny.rwl                        |                                                                                                       | Format problems                                    | File not used                                                                  |
| or015b.rwl                    |                                                                                                       | Subgroup of series from<br>or015.rwl               | File not used                                                                  |
| or082.rwl-<br>or084.rwl       |                                                                                                       | Hyphens in series names<br>cause format problems   | File not used                                                                  |
| or088.rwl                     |                                                                                                       | Arstan cannot read in files                        | Remove hyphens at some of the series<br>names                                  |
| russ020w.rwl,<br>russ022w.rwl |                                                                                                       | Arstan cannot read in files                        | Remove hyphens at the end of each<br>header line                               |
| russ023w.rwl                  | 863122                                                                                                | Erroneous time span                                | Change position of 999                                                         |
| russ024w.rwl                  | 864101, 864162,<br>864172                                                                             | Erroneous time span                                | Change position of 999                                                         |
| russ027w.rwl                  | 870062                                                                                                | Erroneous time span                                | Change position of 999                                                         |
| russ030w.rwl                  | 873282                                                                                                | Erroneous time span                                | Change position of 999                                                         |
| russ031w.rwl                  | 874032, 874091                                                                                        | Erroneous time span                                | Change position of 999                                                         |
| russ032w.rwl                  | 875143                                                                                                | Erroneous time span                                | Change position of 999                                                         |
| russ033w.rwl                  | 876102                                                                                                | Erroneous time span                                | Change position of 999                                                         |
| russ035w.rwl                  | 878021, 878131                                                                                        | Erroneous time span                                | Change position of 999                                                         |
| russ036w.rwl                  | 879382                                                                                                | Erroneous time span                                | Change position of 999                                                         |
| russ039w.rwl                  | 882091, 882111,<br>882112, 882451                                                                     | Erroneous time span                                | Change position of 999                                                         |
| russ040w.rwl                  | 884091                                                                                                | Erroneous time span                                | Change position of 999                                                         |
| russ042w.rwl                  | 886032, 886232                                                                                        | Erroneous time span                                | Change position of 999                                                         |
| russ043w.rwl                  | 892081, 892082                                                                                        | Erroneous time span                                | Change position of 999                                                         |
| russ044w.rwl                  | 892242                                                                                                | Erroneous time span                                | Change position of 999                                                         |
| russ046w.rwl                  | 895271                                                                                                | Erroneous time span                                | Change position of 999                                                         |
| russ051w.rwl                  | 911102                                                                                                | Erroneous time span                                | Change position of 999                                                         |
| russ053w.rwl                  | 913132                                                                                                | Erroneous time span                                | Change position of 999                                                         |
| russ055w.rwl                  | 914122                                                                                                | Erroneous time span                                | Change position of 999                                                         |
| russ056w.rwl                  | 915071                                                                                                | Erroneous time span                                | Change position of 999                                                         |
| russ059w.rwl                  | 919012, 919061,<br>919122                                                                             | Erroneous time span                                | Change position of 999                                                         |
| russ060w.rwl                  | 920161                                                                                                | Erroneous time span                                | Change position of 999                                                         |
| russ062w.rwl                  | 923412, 923421                                                                                        | Erroneous time span                                | Change position of 999                                                         |
| russ064w.rwl                  | 925432                                                                                                | Erroneous time span                                | Change position of 999                                                         |
| russ065w.rwl                  | 926092                                                                                                | Erroneous time span                                | Change position of 999                                                         |
| russ066w.rwl                  | 927272, 927362                                                                                        | Erroneous time span                                | Change position of 999                                                         |
| russ068w.rwl                  | 928020, 928050,<br>928090, 928121,<br>928122, 928170,<br>928261, 928262,<br>928640, 928740,<br>928750 | Erroneous time span                                | Change position of 999                                                         |
| russ073w.rwl                  | 933051, 933052,<br>933072, 933112                                                                     | Erroneous time span                                | Change position of 999                                                         |

|                                                               |                           |                                  |                                                           |
|---------------------------------------------------------------|---------------------------|----------------------------------|-----------------------------------------------------------|
| russ084w.rwl                                                  | 952212, 952281            | Erroneous time span              | Change position of 999                                    |
| russ087w.rwl                                                  | 954172                    | Erroneous time span              | Change position of 999                                    |
| russ089w.rwl                                                  | 956041, 956042,<br>956122 | Erroneous time span              | Change position of 999                                    |
| russ090w.rwl                                                  | 957051, 957081,<br>957131 | Erroneous time span              | Change position of 999                                    |
| russ093w.rwl                                                  | 960152                    | Erroneous time span              | Change position of 999                                    |
| russ098w.rwl                                                  | 965181, 965262            | Erroneous time span              | Change position of 999                                    |
| russ099w.rwl                                                  | 966051, 966111            | Erroneous time span              | Change position of 999                                    |
| russ152w.rwl                                                  | 977191                    | Erroneous time span              | Change position of 999                                    |
| spai002.rwl                                                   | 493062                    | Erroneous time span              | Add 999 at end of series                                  |
| swed019w.rwl-<br>swed023w.rwl                                 |                           | Arstan cannot read in files      | Remove hyphens at the end of each header line             |
| swit102.rwl-<br>swit120.rwl,<br>swit138w.rwl-<br>swit140w.rwl |                           | Arstan cannot read in files      | Remove hyphens at the end of each header line             |
| swit177w.rwl                                                  |                           | 0 in data gaps                   | File not used                                             |
| turk033.rwl                                                   |                           | Arstan cannot read in files      | Remove hyphens at the end of each label in each line      |
| tx040.rwl                                                     |                           | Data has been removed from ITRDB | File not used                                             |
| ut510.rwl-<br>ut512.rwl                                       |                           | Arstan cannot read in files      | Remove hyphens at the end of each header line             |
| va20.rwl                                                      | 3996                      | Erroneous time span              | Add 999 at end of series                                  |
| wa034.rwl                                                     | 711091                    | Erroneous time span              | Add 999 at end of series<br>Delete double years 1730-1890 |
| wa043.rwl                                                     | 66041                     | Erroneous time span              | Add 999 at end of series                                  |

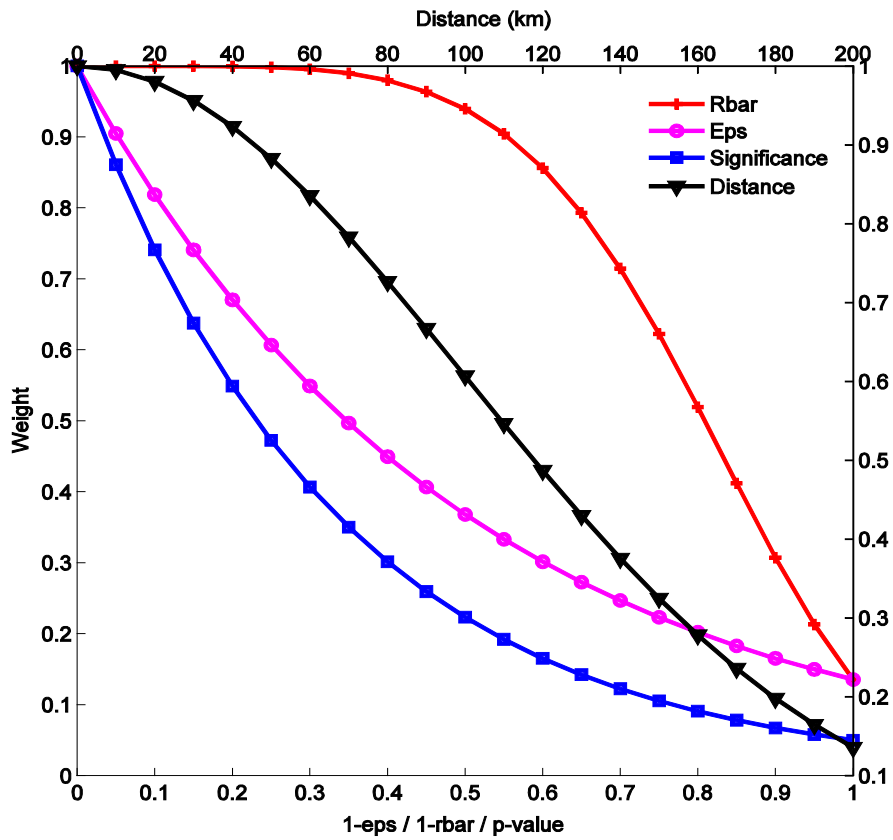

**Fig. S1.** Weight functions for tree-ring chronologies located within a 200 km search circle around

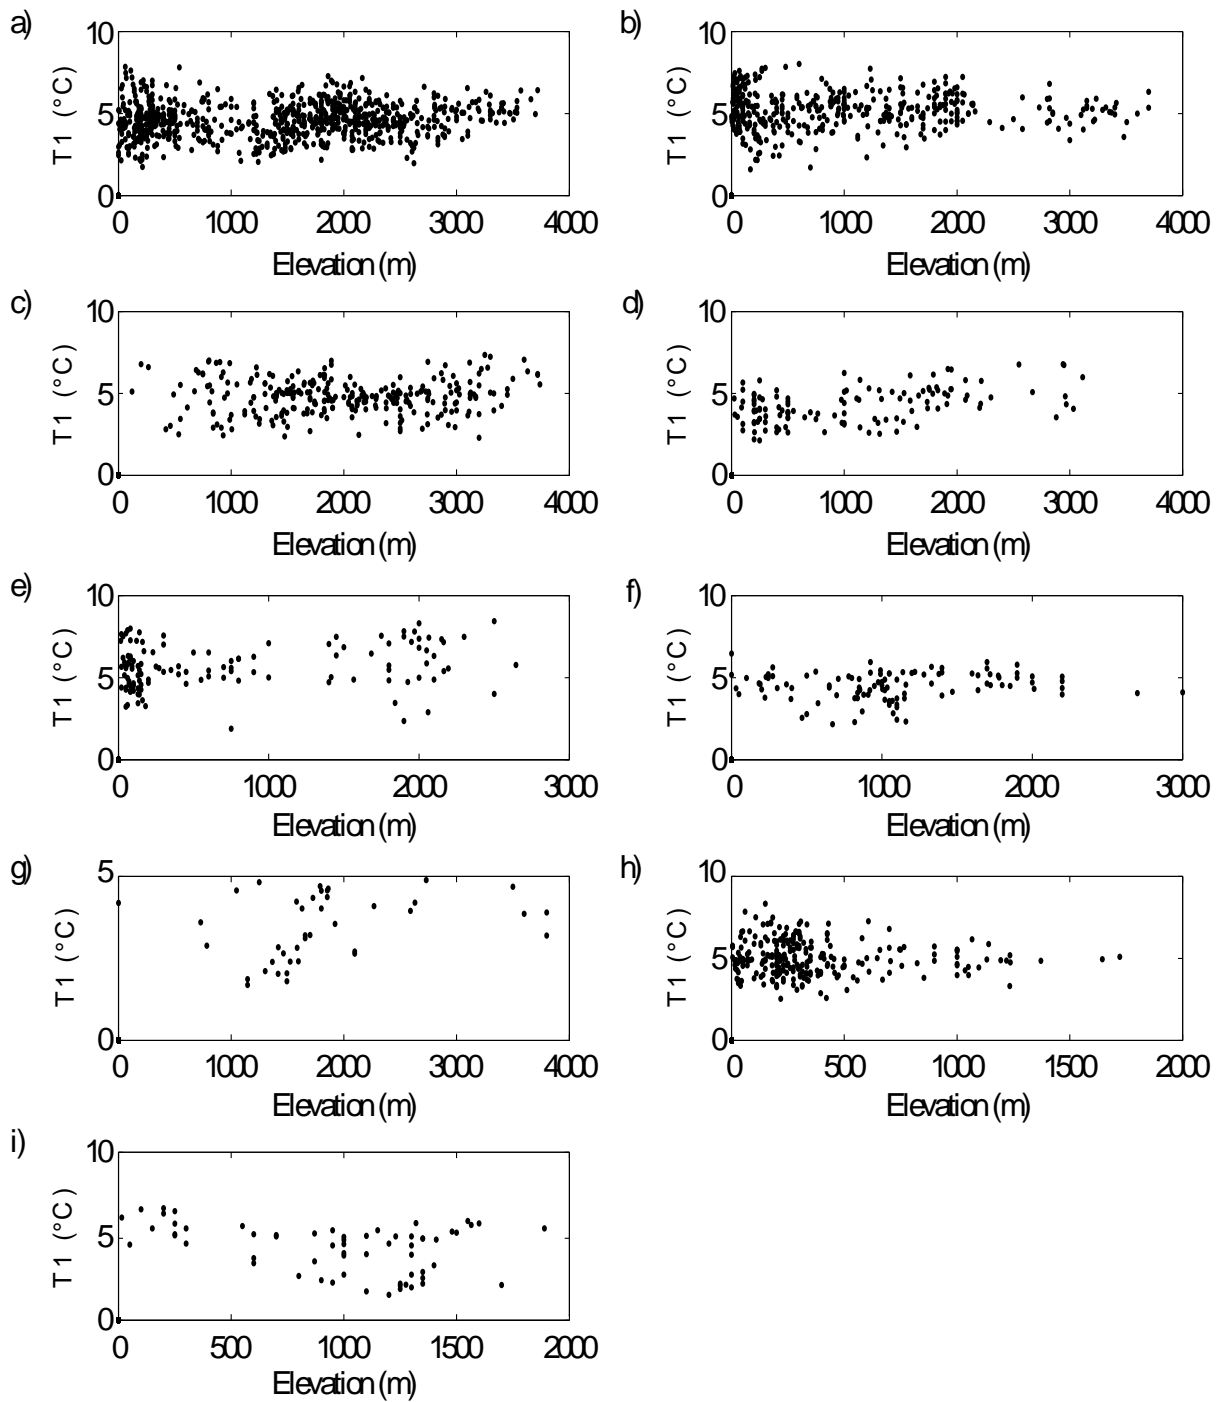

**Fig. S2.** Comparison of the site values of the threshold temperature  $T_1$  at corresponding elevations for different tree genera: a) pine, b) spruce, c) fir, d) hemlock, e) larch, f) cedar, g) juniper, h) oak, and i) nothofagus.

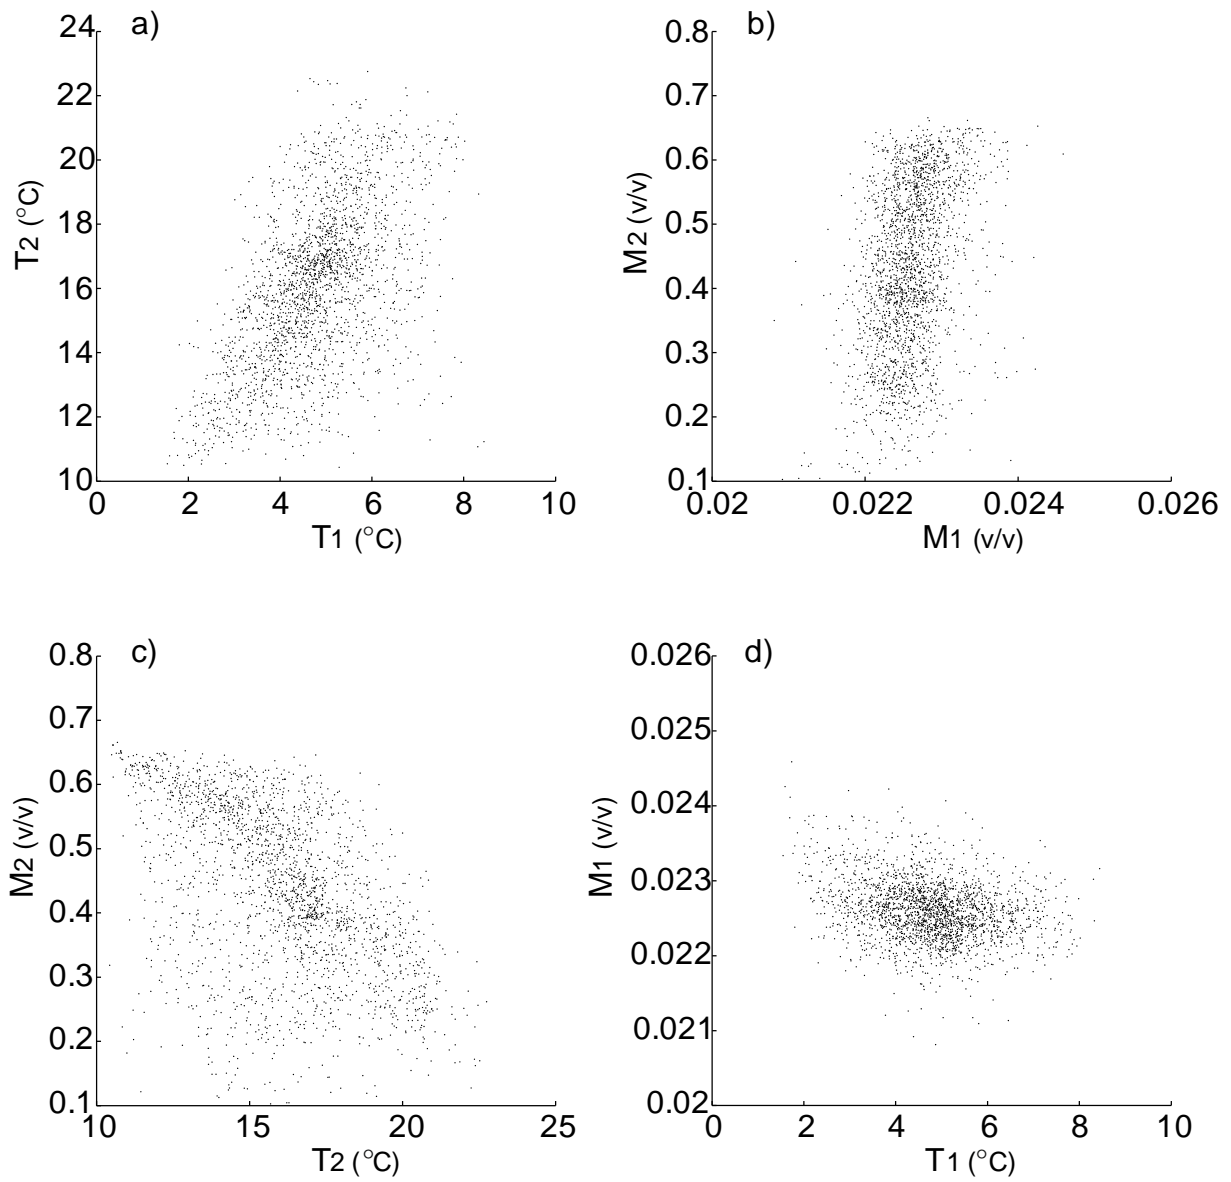

**Fig. S3.** Scatterplots of joint posterior relationships at each site between parameters a)  $T_1$  and  $T_2$ , b)  $M_1$  and  $M_2$ , c)  $T_2$  and  $M_2$ , and d)  $T_1$  and  $M_1$ .
